# Supplementary material for: Genomic Insights into Bacterial Resistance to Proline-Rich Antimicrobial Peptide Bac7
Source: MDPI journal article supplement (doi:10.3390/membranes13040438), 2023-04-17
Supplement: s1 [file s1]

## *Supplementary Materials*

### **Genomic insights into bacterial resistance to proline-rich antimicrobial peptide Bac7**

*Pavel V. Pantelev\*, Victoria N. Safronova, Roman N. Kruglikov, Ilia A. Bolosov, Tatiana V. Ovchinnikova*

M.M. Shemyakin & Yu.A. Ovchinnikov Institute of Bioorganic Chemistry, the Russian Academy of Sciences, Miklukho-Maklaya str., 16/10, 117997 Moscow, Russia; victoria.saf@ibch.ru (V.N.S.); kruglikov1911@mail.ru (R.N.K.); bolosov@ibch.ru (I.A.B.); contraton@mail.ru (I.V.B.); ovch@ibch.ru (T.V.O.)

\* Correspondence: ibch@inbox.ru; Tel.: +7-495-335-09-00

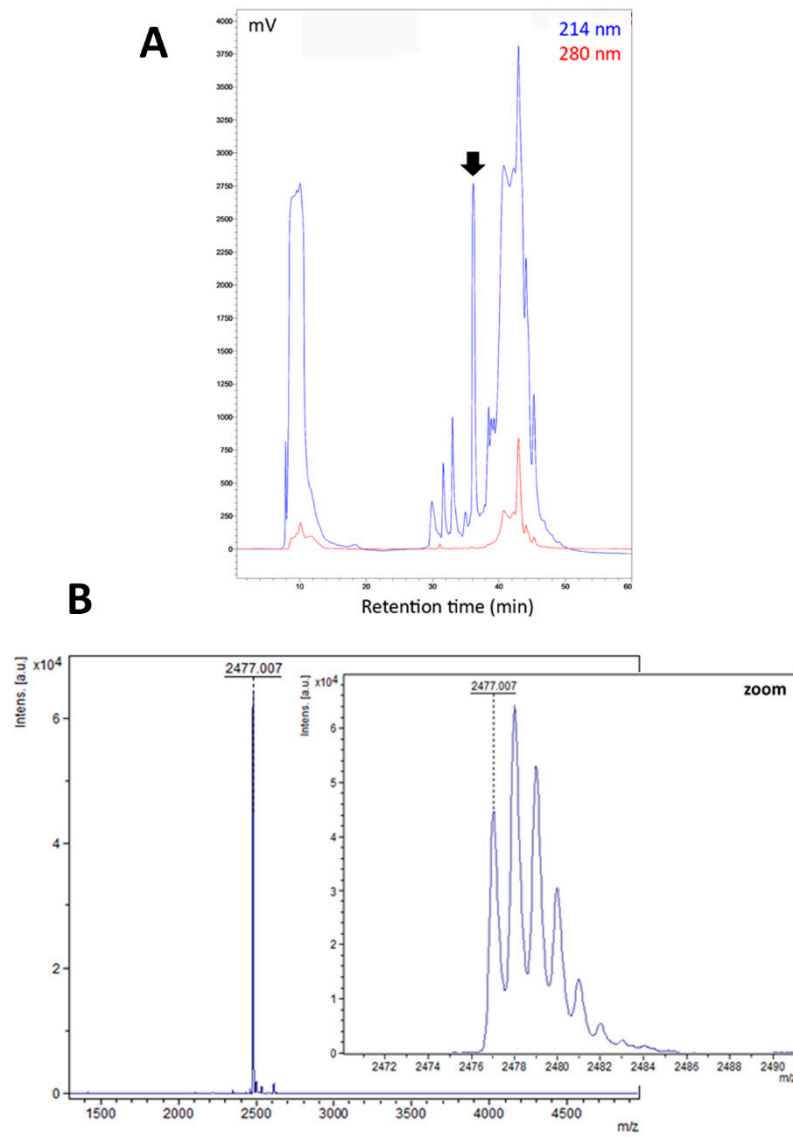

**Figure S1.** Purification of the recombinant pexiganan. **(A)** Reverse-phase high-performance liquid chromatography (RP-HPLC) purification of the recombinant pexiganan. The fraction of the target peptide is marked with an arrow. **(B)** MALDI-TOF mass spectrometry analysis of the recombinant pexiganan. The experimental  $[M + H]^+$  monoisotopic mass is presented in the picture.

| Antimicrobial              | Class                     | WGS-predicted phenotype | Genetic background                 |
|----------------------------|---------------------------|-------------------------|------------------------------------|
| amikacin                   | aminoglycoside            | No resistance           | blaCTX-M-15 (blaCTX-M-15_AY044436) |
| tigecycline                | tetracycline              | No resistance           |                                    |
| tobramycin                 | aminoglycoside            | No resistance           |                                    |
| cefepime                   | beta-lactam               | Resistant               |                                    |
| chloramphenicol            | amphenicol                | No resistance           | blaCTX-M-15 (blaCTX-M-15_AY044436) |
| piperacillin+tazobactam    | beta-lactam               | No resistance           |                                    |
| cefoxitin                  | beta-lactam               | No resistance           |                                    |
| ampicillin                 | beta-lactam               | Resistant               |                                    |
| ampicillin+clavulanic acid | beta-lactam               | No resistance           | blaCTX-M-15 (blaCTX-M-15_AY044436) |
| cefotaxime                 | beta-lactam               | Resistant               |                                    |
| ciprofloxacin              | quinolone                 | Resistant               |                                    |
| colistin                   | polymyxin                 | No resistance           |                                    |
| sulfamethoxazole           | folate pathway antagonist | Resistant               | sul1 (sul1_U12338)                 |
| imipenem                   | beta-lactam               | No resistance           | gyrA (p.S83L), gyrA (p.D87N)       |
| trimethoprim               | folate pathway antagonist | No resistance           |                                    |
| nalidixic acid             | quinolone                 | Resistant               |                                    |
| ertapenem                  | beta-lactam               | No resistance           |                                    |
| tetracycline               | tetracycline              | No resistance           | blaCTX-M-15 (blaCTX-M-15_AY044436) |
| fosfomycin                 | fosfomycin                | No resistance           |                                    |
| ceftazidime                | beta-lactam               | Resistant               |                                    |
| temocillin                 | beta-lactam               | No resistance           |                                    |
| gentamicin                 | aminoglycoside            | No resistance           | mph(A) (mph(A)_D16251)             |
| meropenem                  | beta-lactam               | No resistance           |                                    |
| azithromycin               | macrolide                 | Resistant               |                                    |

**Figure S2.** Identification of antibiotic resistance genes in *E. coli* MDR 1057 strain performed using ResFinder 4.1 (<https://cge.food.dtu.dk/services/ResFinder/>).

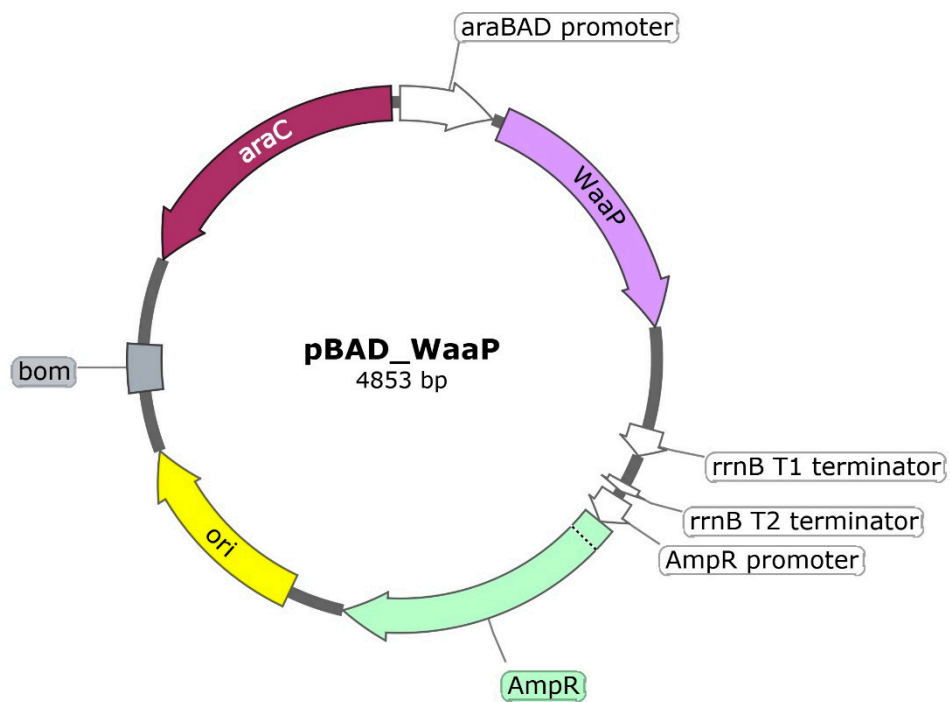

**Figure S3.** pBAD-based plasmid vector for the expression of *waaP* under the tightly regulated arabinose promoter. Map was visualized with SnapGene software.

...cggcgcatgcgctggggctgacggcggatgatcagttcttccattgagtcgagcttaggtctaataactggcgcg  
 gattgctgcctgggttaacgccagacaccattccgggactggacacgctggatctgatgcaggtgcagcaggttcgtc  
 gctggccggggagtgccactgccgttagtgacgcttgatgcactggagcggctgttatgatcttctctgactggccgt  
 ggcgtcactggcggcaagtgcggggagaagccatcgctttacgtcttaatacagagcaactcaactggcgcgagctt  
 tgtgctcgctcgatgaattagcctccagcttttgcggcgaggggtgtggttgcgggcagcggcgtgatgttgcgggc  
 gtggaatacggcgcaaacgctgctggcctggctggcgttactgcaatgcggggcgcggtgttgcccgtaaccctc  
 agctgccgcaaccgctgcttgaggaattgctgccaatcttacgctgcaatttgcgctgggtgccggaaggggaaaac  
 acgtttccggcgtaacgtcgctgcataattcagcaggttgaaggcgtacatgccgtggcgtggcagccgacgcgtct  
 gtgctcaatgacgttaacctctgggtccactggcttgcgaaagccgctgttcatacttatcaggctcatcttgcca  
 gcgcgaaggggtgttatcgctgattccgtttggcgatcacgatgactggttgctctctttaccgctgtttcacgtc  
 tccggtcaggggaattatgtggcgctgggtatacgtggtgcgcggatgacggtagctgataaacagccattggagca  
 aatgctggcaggtgtacgcacgcttactggtgccaacacaactctggcgtttgctgggttaaccgtagttccgttt  
 ccctgaaagcgggtttacttggcgcgcggtatcccgctcgagttgacggaacaggcgcgcgagcaggggattcgg  
 tgcttttgcggctatggctgacgagtttgcctccacggtgtgtgcgaaagaagccgacggcttgccagacgtcgg  
 ttgcgcgtgcccgggtcggaagtgaatacgtaaacgacgaagtgtggctgcccgtgccagcatggcagaaggtt  
 actggcgtaacgggcaacgggttccactgggttaatgacgaaggctggtacgccacgcgcgatcgcggtgagatgat  
 aatggcaagctgaccattgtcggaagtttagacaatctgttcttcagtgggtggcgaaggcattcagccagaagaagt  
 cgagcgcttattgctgcacatcctgcggttttgcaggtgtttatcgttcccggttgcgacaaggagtttggtcatc  
 gaccgtagcggtggtggagtatgaccagcaaacggtgatcttggcgaatgggtgaaagataagctggcccggtttt  
 caacaaccggtgcgctggctgactttaccgcccggagctgaaaaacggcggtattaaaatttcacgtcaggcggttaa  
 agagtgggtgcaacgccaggatcaagaaatcattagtttcacttccaattttgccattccattgccgttgataata  
 ggtttatctgttaatctgtaaattgatgtgaaaactcttatcaaacaggataatgcatcgaatggctgggtcaaaaa  
 atcgctgctgcaataaaacaaaataacagacatgtacttatgctctgcgatgctggcggcgcgataaaaaatgatcgccg  
 aagtgaagagtgacttcgccgtgaaagtgggggatttactctgcctttgcagaatgcgctttactgtattaatcgt  
 gaaaagctgcacacgggtgaaagtctttctgcaagctgttatagccccgatgagtgggaacggcagtgtaaagcggc  
 agggaaaactcagcaacgttgtttgttggcaggaaaatcagcatcaaccgctcataatacaggctactcca  
 gtagtgctttcagcgaaaaagtccctcccagccgggaagtaccattgaagcaatccataaccagcacataactcata  
 ctgagcaaggcataggctttgcttagcgcaagtttatgtagtggtttataccaacaaaaaacggaaagcagataa...

**Figure S4.** A fragment of *E. coli* MDR 1057 genome sequence showing intergenic *menE-pmrD* region. The found SNP mutation is highlighted with yellow color. Start and termination codons in the corresponding genes are marked with green and red color, respectively.

**Table S1.** Oligonucleotide primers used in this study

| Name  | Sequence 5'→3'                                                         | Description                                                                                                      |
|-------|------------------------------------------------------------------------|------------------------------------------------------------------------------------------------------------------|
| Pex-f | GC <u>CAGATCT</u> CATATGGGGATCGGCAAATTCCTTAAAGAAAGCGAAGAAGTTCGGGAAAGCC | Synthesis of DNA fragment encoding pexiganan followed by insertion into pET expression plasmid                   |
| Pex-r | GCGAATTCCTTATTTCTTCAGAATTTTCACAAAGGCTTCCCGAACTTCT                      |                                                                                                                  |
| Sbm-f | GTCGAAACAATTCTTATGGTCAG                                                | Amplification of <i>sbmA</i> gene of <i>E. coli</i> (TA-cloning followed by Sanger sequencing)                   |
| Sbm-r | GCGAAGATAGAGGATTGACGCG                                                 |                                                                                                                  |
| Waa-f | GCCCATGGTTGAACTTAAAGAGCCGTTTG                                          | Amplification of <i>waaP</i> gene of <i>E. coli</i> to insert into pBAD plasmid by NcoI/EcoRI sites (underlined) |
| Waa-r | CGGAATTCCTTATAATCCTTTGCGTTGTGTTTCGC                                    |                                                                                                                  |

**Table S2.** Amino acid sequences and molecular masses of AMPs used in this study

| Peptide                 | Origin | Sequence                                | Molecular mass, Da                                     |                                | Source                  |
|-------------------------|--------|-----------------------------------------|--------------------------------------------------------|--------------------------------|-------------------------|
|                         |        |                                         | Calculated<br>[M+H] <sup>+</sup><br>value <sup>1</sup> | Measured<br>value <sup>2</sup> |                         |
| Bac7 <sub>1-22</sub>    | Rec    | RRIRPRPPRLPRPRRPLPFPR                   | 2783.72                                                | 2783.89                        | [1]                     |
| PR-39 <sub>1-22</sub>   | Rec    | RRRPRPPYLPRRPPPPFFPRL                   | 2765.61                                                | 2765.35                        | [1]                     |
| mini-ChBac7.5N $\alpha$ | Rec    | RRLRPRRRLPRPRRPRRPR                     | 2894.81                                                | 2894.05                        | [2]                     |
| VicBac                  | Synt   | RRIRRPRLPRPRVPRPRIPPRIPRVLPPPRVPFPRFPR* | 4815.98                                                | 4815.70                        | [1]                     |
| AA139                   | Rec    | GFCWYVCARRNGARVCYRRCN                   | 2549.17                                                | 2550.07                        | [3]                     |
| Tachyplesin-1           | Rec    | KWCFRVCYRGICYRRCR                       | 2264.08                                                | 2263.73                        | [4]                     |
| Protegrin-1             | Rec    | RGGRLCYCRRRFCVCVGR                      | 2156.07                                                | 2156.01                        | [5]                     |
| Thanatin                | Rec    | GSKKPVPIIYCNRRRTGKCQRL                  | 2415.32                                                | 2415.36                        | [6]                     |
| Pexiganan               | Rec    | GIGKFLKKAKKFGKAFVKILKK                  | 2476.61                                                | 2477.01                        | This study <sup>3</sup> |
| ChMAP-28                | Rec    | GRFKRFRKKLKRLWHKVGPFVGPILHY             | 3364.00                                                | 3364.22                        | [2]                     |
| Melittin                | Synt   | GIGAVLKVLTTGLPALISWIKRKRQQ              | 2846.74                                                | 2846.60                        | [1]                     |
| LL-37                   | Synt   | LLGDFFRKSKEKIGKEFKRIVQRIKDFLRNLPRTES    | 4491.58                                                | 4491.40                        | [1]                     |

Rec – recombinant peptide

Synt – synthetic peptide

\* C-terminal amidation

<sup>1</sup> according to ExPASy Isotopident tool

<sup>2</sup> monoisotopic m/z were measured using MALDI-TOF MS

<sup>3</sup> final yield of pexiganan was 6.7 mg per liter of the culture medium.

### Supplementary References:

1. Panteleev, P.V.; Safronova, V.N.; Kruglikov, R.N.; Bolosov, I.A.; Bogdanov, I.V.; Ovchinnikova, T.V. A Novel Proline-Rich Cathelicidin from the Alpaca Vicugna Pacos with Potency to Combat Antibiotic-Resistant Bacteria: Mechanism of Action and the Functional Role of the C-Terminal Region. *Membranes* **2022**, *12*, 515, doi:10.3390/membranes12050515.
2. Panteleev, P.V.; Bolosov, I.A.; Kalashnikov, A.À.; Kokryakov, V.N.; Shamova, O.V.; Emelianova, A.A.; Balandin, S.V.; Ovchinnikova, T.V. Combined Antibacterial Effects of Goat Cathelicidins With Different Mechanisms of Action. *Front. Microbiol.* **2018**, *9*, 2983, doi:10.3389/fmicb.2018.02983.
3. Krenev, I.A.; Panteleev, P.V.; Umnyakova, E.S.; Gorbunov, N.P.; Kostevich, V.A.; Balandin, S.V.; Ovchinnikova, T.V.; Aleshina, G.M.; Berlov, M.N. In Vitro Modulation of Complement Activation by Therapeutically Prospective Analogues of the Marine Polychaeta Arenicin Peptides. *Mar. Drugs* **2022**, *20*, 612, doi:10.3390/md20100612.
4. Panteleev, P.V.; Ovchinnikova, T.V. Improved Strategy for Recombinant Production and Purification of Antimicrobial Peptide Tachyplesin I and Its Analogs with High Cell Selectivity. *Biotechnol. Appl. Biochem.* **2017**, *64*, 35–42, doi:10.1002/bab.1456.
5. Panteleev, P.V.; Bolosov, I.A.; Khokhlova, V.A.; Dhanda, G.; Balandin, S.V.; Haldar, J.; Ovchinnikova, T.V. Analysis of Antibacterial Action of Mammalian Host-Defense Cathelicidins and Induction of Resistance to Them in M $\beta$ L-Producing *Pseudomonas Aeruginosa*. *Bull. Exp. Biol. Med.* **2022**, *172*, 447–452, doi:10.1007/s10517-022-05411-8.
6. Panteleev, P.V.; Balandin, S.V.; Ovchinnikova, T.V. Effect of Arenicins and Other  $\beta$ -Hairpin Antimicrobial Peptides on *Pseudomonas Aeruginosa* PAO1 Biofilms. *Pharm. Chem. J.* **2017**, *50*, 715–720, doi:10.1007/s11094-017-1518-2.
